# Supplementary material
Source: PubMed Central journal article supplement (PMC514386)
Supplement: nar_32_14_4269__1.pdf [file nar_32_14_4269__1.pdf]

# **DNA AND ITS COUNTERIONS: A MOLECULAR DYNAMICS STUDY**

Péter Várnai and Krystyna Zakrzewska

Laboratoire de Biochimie Théorique, CNRS UPR 9080  
Institut de Biologie Physico-Chimique  
13 rue Pierre et Marie Curie, Paris 75005, France

## **Supplementary material:**

Figure S1

Figure S2

Figure S3

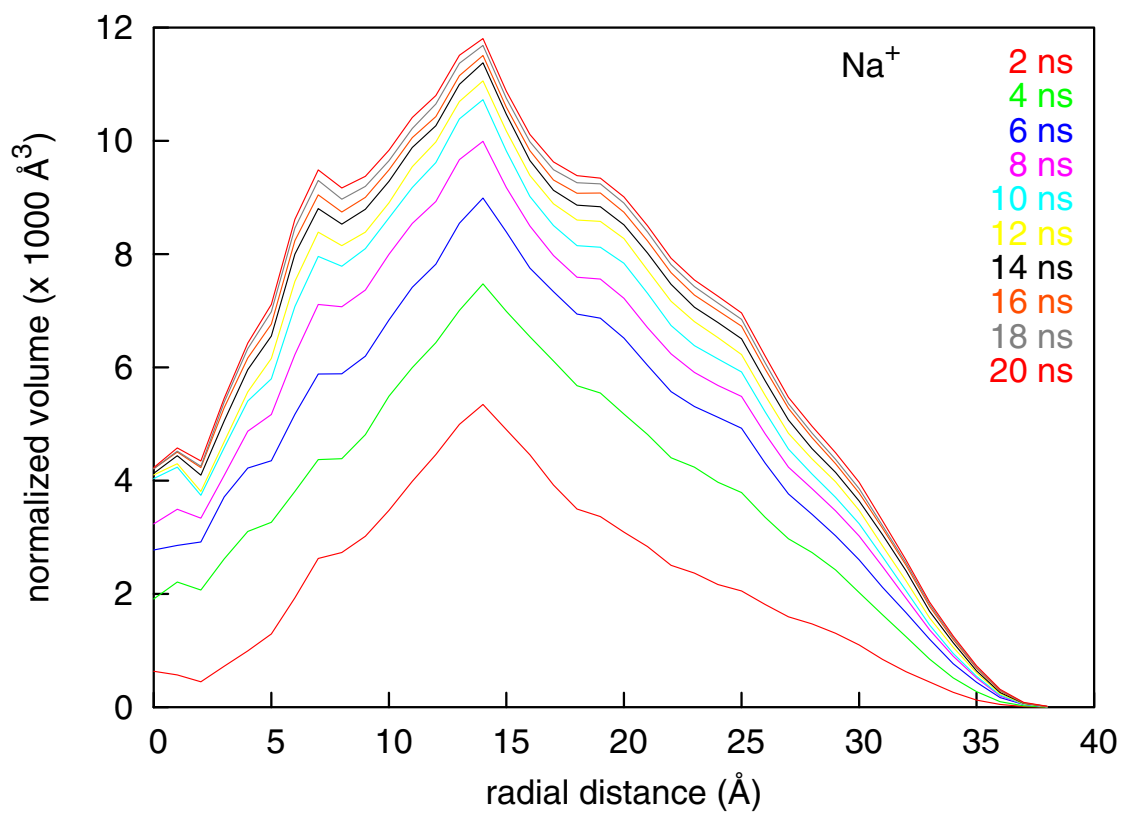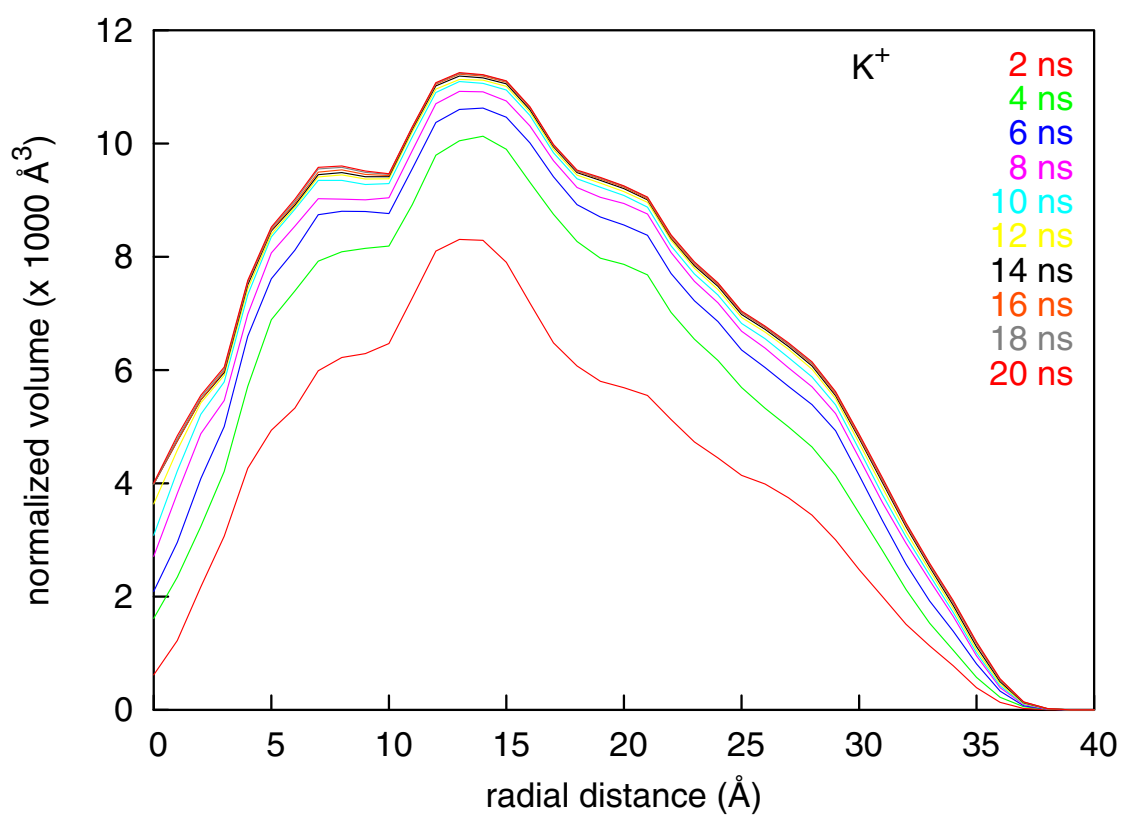

**Figure S1.** Normalized volume of cylindrical shells around DNA sampled by Na<sup>+</sup> (top) and K<sup>+</sup> (bottom) versus radial distance from a linear DNA axis during the first 20 ns simulation time.

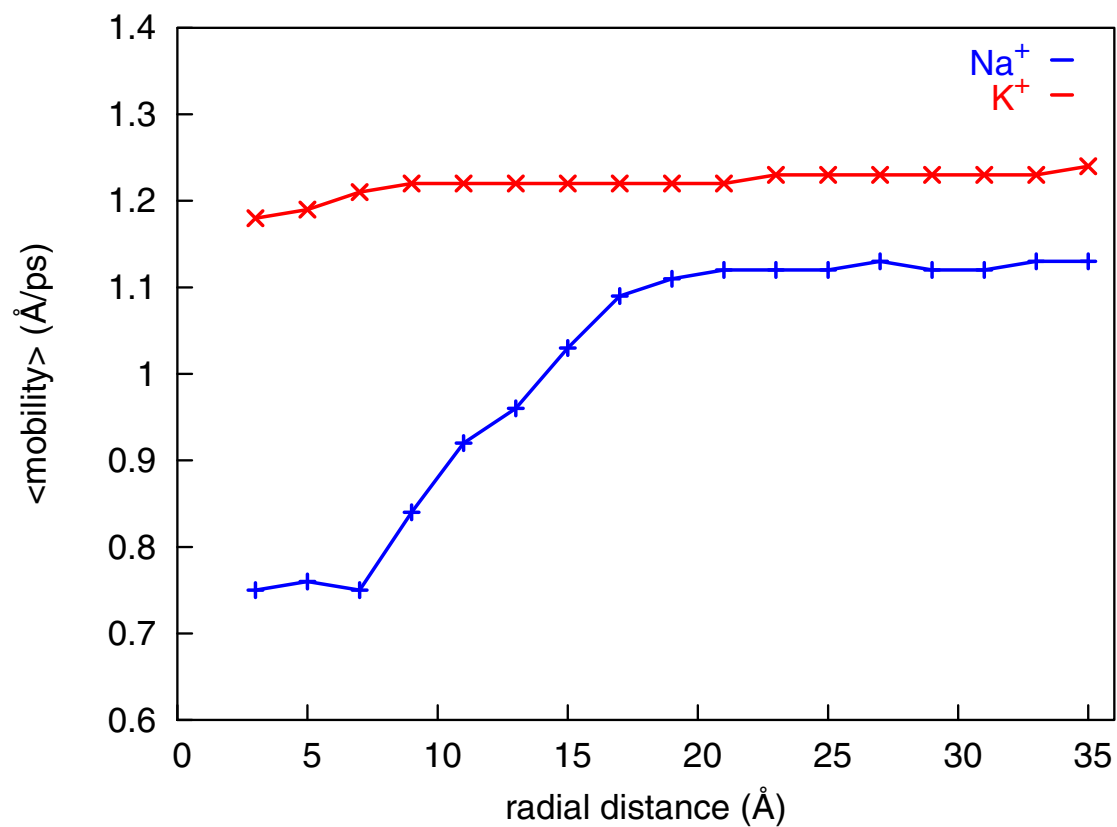

**Figure S2.** Ion mobility calculated as a function of the mean distance of ions from the DNA axis over 50 ns simulation time with Na<sup>+</sup> (blue) and K<sup>+</sup> (red) counterions.

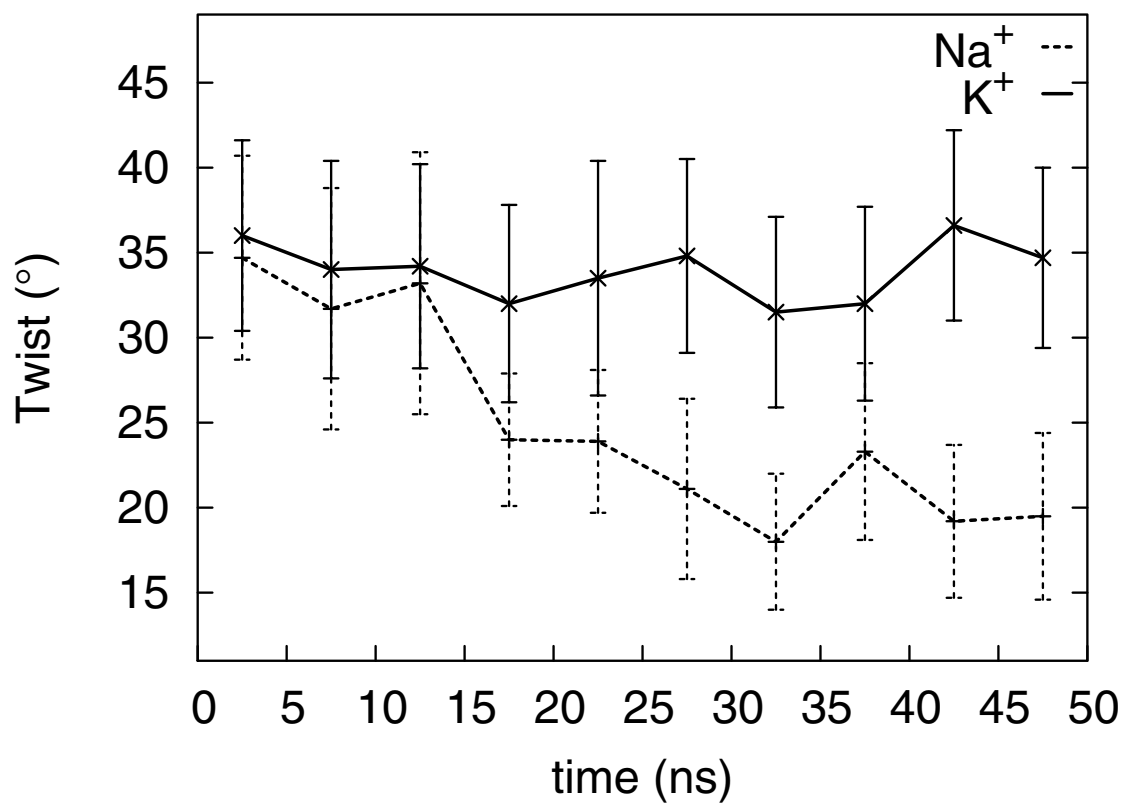

**Figure S3.** Twist angle between levels C<sub>8</sub>/T<sub>9</sub> as a function of simulation time. Average values over 5 ns with standard deviation are given for simulation with Na<sup>+</sup> (dotted line) and K<sup>+</sup> counterions (solid line).
